# Supplementary material for: Neuronal‐specific proteasome augmentation via Prosβ5 overexpression extends lifespan and reduces age‐related cognitive decline
Source: PubMed Central journal article supplement (PMC6718538; doi:10.1111/acel.13005), 2019-07-23
Supplement: ACEL-18-e13005-s001.pdf [file ACEL-18-e13005-s001.pdf]

Native PAGE immunoblot  
(uncropped)  
anti-proteasome

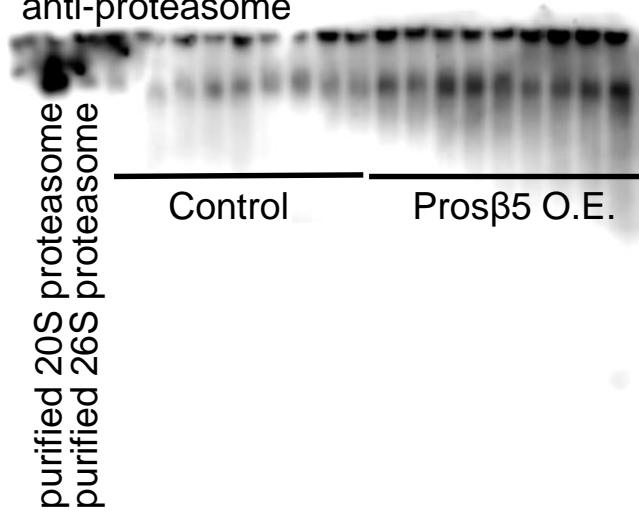

Protein loading  
(india ink stain)

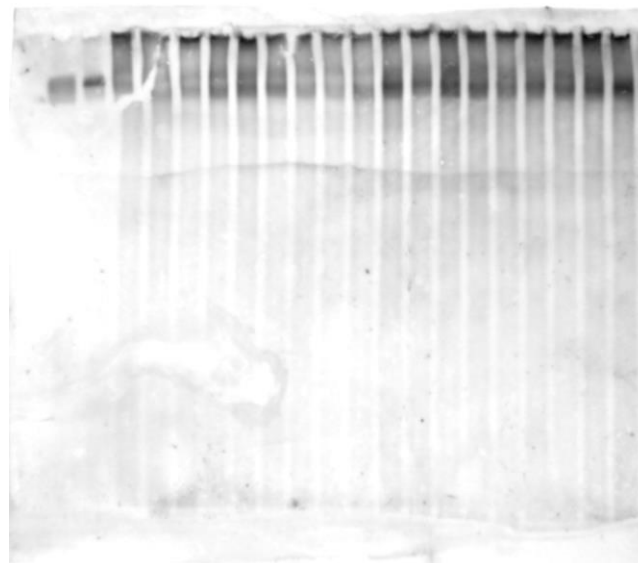

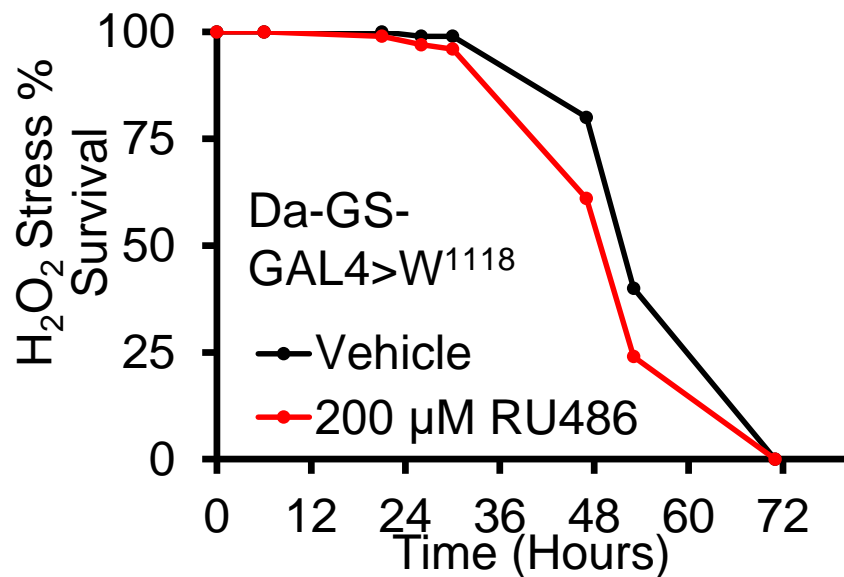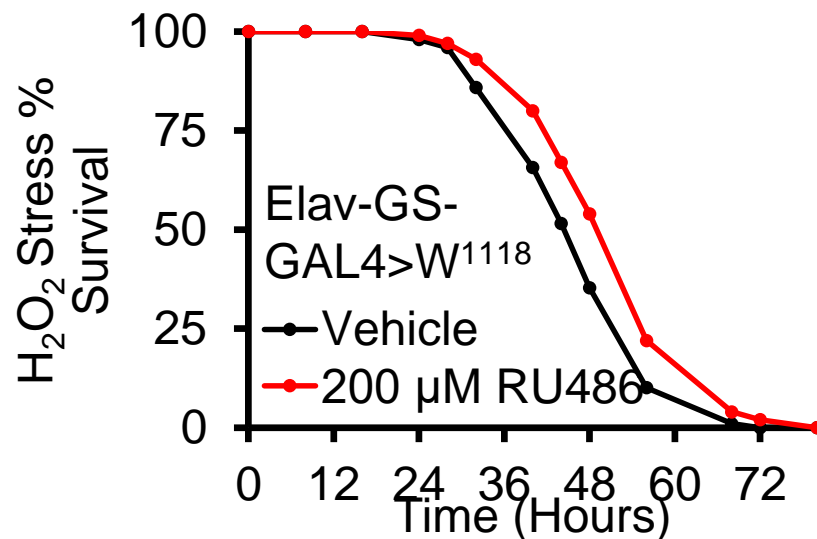

Supplemental Figure 2:

H<sub>2</sub>O<sub>2</sub> stress survival assay RU486 controls for Figures 1E and 2F. RU486 treatment produces minimal changes to oxidative stress under control of the drivers Da-GS-GAL4 and Elav>GS-GAL4. Flies were fed 4.4M H<sub>2</sub>O<sub>2</sub> mixed with 5% sucrose, survival was monitored every 8 hr, N = 75. Flies were removed from RU486 during stress assay to prevent potential differences in consumption.

|                                    | - RU486 | + RU486 | %    | Chi-Square | Logrank |
|------------------------------------|---------|---------|------|------------|---------|
| DA-GS-GAL4>UAS-Prosβ5<br>N ≈ 200   |         |         |      |            |         |
| Median (50%)                       | 75.4    | 75.3    | -0.2 | 2.5        | 0.11    |
| Maximum (10%)                      | 87.1    | 84.9    | -2.6 |            |         |
| Tub5-GS-GAL4>UAS-Prosβ5<br>N ≈ 250 |         |         |      |            |         |
| Median (50%)                       | 66.0    | 66.5    | 0.8  | 0.2        | 0.64    |
| Maximum (10%)                      | 74.7    | 73.7    | -1.3 |            |         |

Supplemental Figure 3:  
Lifespan statistics for Figures 1F-G.

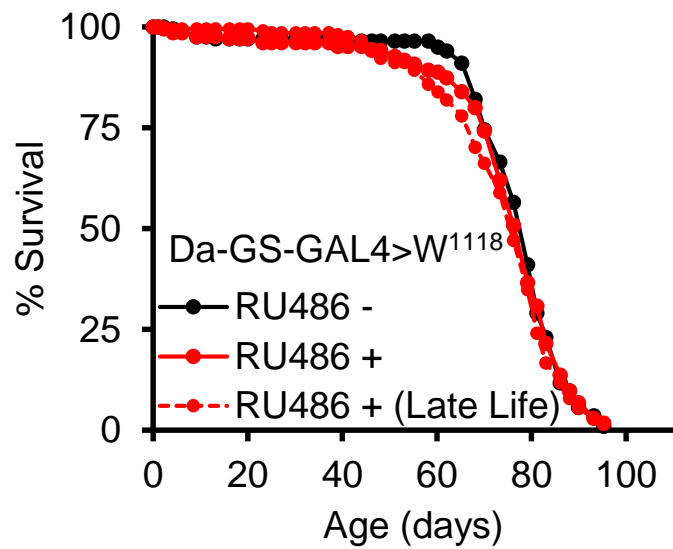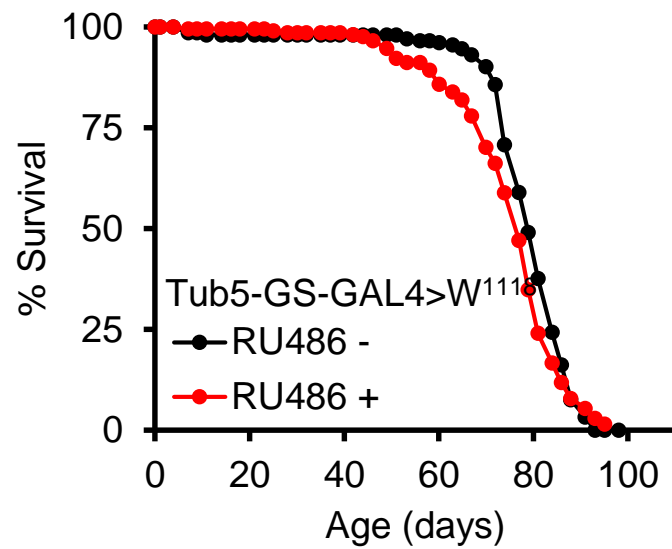

Supplemental Figure 4:  
Lifespan RU486 controls for Figure 1F-G.

|                    | Elav-GS-GAL4>UAS-Prosβ5 |         |      |            |                        |
|--------------------|-------------------------|---------|------|------------|------------------------|
|                    | - RU486                 | + RU486 | %    | Chi-Square | Logrank                |
| Lifespan 1 N ≈ 250 |                         |         |      |            |                        |
| Median (50%)       | 77.4                    | 86.5    | 11.9 | 66         | 4.44x10 <sup>-16</sup> |
| Maximum (10%)      | 89.1                    | 98.4    | 10.4 |            |                        |
| Lifespan 2 N ≈ 175 |                         |         |      |            |                        |
| Median (50%)       | 63.3                    | 68.7    | 8.5  | 77.8       | <1x10 <sup>-18</sup>   |
| Maximum (10%)      | 68.7                    | 77.6    | 12.9 |            |                        |
| Lifespan 3 N ≈ 225 |                         |         |      |            |                        |
| Median (50%)       | 67.0                    | 77.8    | 16.1 | 176        | <1x10 <sup>-18</sup>   |
| Maximum (10%)      | 70.0                    | 85.3    | 21.7 |            |                        |
| Lifespan 4 N ≈ 250 |                         |         |      |            |                        |
| Median (50%)       | 83.9                    | 88.9    | 5.9  | 22.6       | 2.03x10 <sup>-6</sup>  |
| Maximum (10%)      | 93.1                    | 99.2    | 6.5  |            |                        |

|                    | Elav-GS-GAL4>W <sup>1118</sup> |         |      |            |         |
|--------------------|--------------------------------|---------|------|------------|---------|
|                    | - RU486                        | + RU486 | %    | Chi-Square | Logrank |
| Lifespan 1 N ≈ 175 |                                |         |      |            |         |
| Median (50%)       | 98.0                           | 97.3    | -0.7 | 2.4        | 0.12    |
| Maximum (10%)      | 104.5                          | 104.4   | -0.2 |            |         |
| Lifespan 2 N ≈ 175 |                                |         |      |            |         |
| Median (50%)       | 85.5                           | 86.6    | 1.2  | 77.8       | 0.04    |
| Maximum (10%)      | 92.2                           | 95.6    | 3.6  |            |         |

Supplemental Figure 5:  
Lifespan statistics for Figures 2A-B.

**A**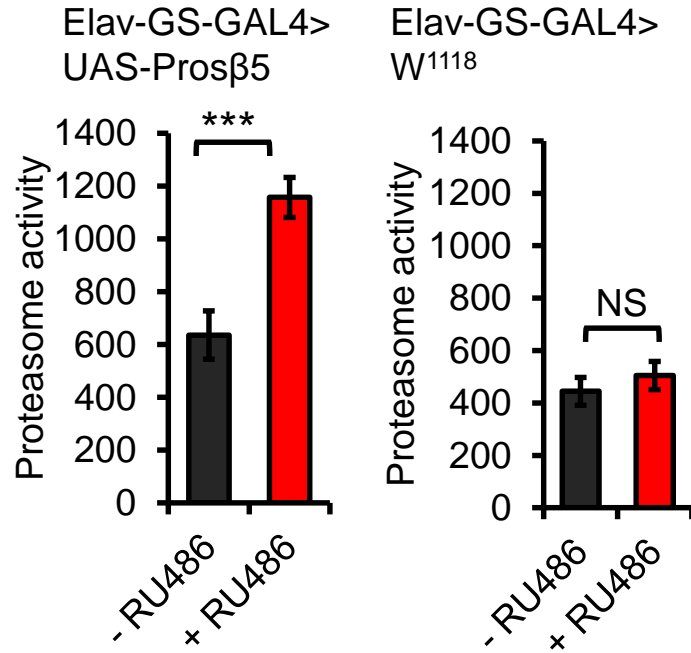**B**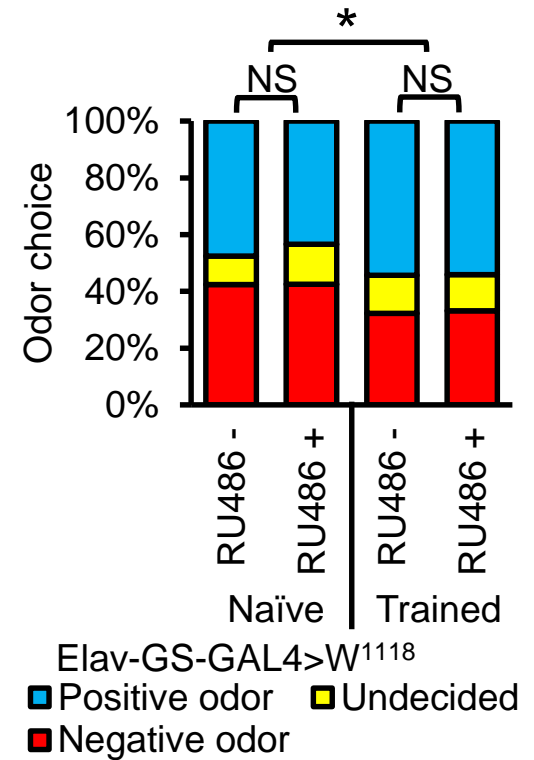

Supplemental Figure 6:

A. RU486-induced Prosβ5 overexpression increases under control of the Elav-GS-GAL4 (Elav-GS-GAL4>Prosβ5) driver increases 20S proteasome based on an Suc-LLVY-AMC activity assay. No increase in activity seen in flies lacking the transgene (Elav-GS-GAL4>W<sup>1118</sup>), N = 12. **B.** RU486 treatment does not alter behavior in olfaction aversion training. Assay performed in 10 day old Elav-GS-GAL4>W<sup>1118</sup> flies, N = 150.
